# Supplementary material for: Overcoming hypoxia-induced tumor radioresistance in non-small cell lung cancer by targeting DNA-dependent protein kinase in combination with carbon ion irradiation
Source: Springer Nature journal article supplement (doi:10.1186/s13014-017-0939-0), 2017-12-01
Supplement: MOESM1 [file 15336784]

# Supplementary Materials for

## Overcoming hypoxia-induced tumor radioresistance in non-small cell lung cancer by targeting DNA-dependent protein kinase in combination with carbon ion irradiation

Carmen Klein<sup>1-4</sup>, Ivana Dokic<sup>1-4</sup>, Andrea Mairani<sup>1-5</sup>, Steward Mein<sup>1-4</sup>, Stefan Brons<sup>4</sup>, Peter Häring<sup>3</sup>, Thomas Haberer<sup>4</sup>, Oliver Jäkel<sup>3</sup>, Astrid Zimmerman<sup>7</sup>, Frank Zenke<sup>7</sup>, Andree Blaukat<sup>7</sup>, Jürgen Debus<sup>1-4</sup>, Amir Abdollahi<sup>1-4\*</sup>

<sup>1</sup> Division of Molecular and Translational Radiation Oncology, National Center for Tumor Diseases (NCT), Heidelberg University Hospital, Heidelberg, Germany.

<sup>2</sup> German Cancer Consortium (DKTK), Heidelberg, Germany

<sup>3</sup> Heidelberg Institute of Radiation Oncology (HIRO), German Cancer Research Center (DKFZ), Heidelberg, Germany.

<sup>4</sup> Heidelberg Ion-Beam Therapy Center (HIT), Heidelberg, Germany.

<sup>5</sup> National Center for Oncological Hadrontherapy (CNAO), Pavia, Italy.

<sup>6</sup> Medical Physics in Radiation Therapy, German Cancer Research Center, Heidelberg, Germany.

<sup>7</sup> Merck, Darmstadt, Germany

### \*Correspondence to:

Amir Abdollahi, MD, PhD  
Division of Molecular and Translational Radiation Oncology  
Heidelberg Ion-Beam Therapy Center (HIT)  
Im Neuenheimer Feld 450  
69120 Heidelberg  
Germany  
Tel: +49-6221-56-39604  
Fax: +49-6221-56-8537  
Email: a.amir@dkfz.de; amir.abdollahi@med.uni-heidelberg.de

### This PDF file includes:

|                                   |        |
|-----------------------------------|--------|
| I. Supplementary Figure S1.....   | page 2 |
| II. Supplementary Figure S2.....  | page 3 |
| III. Supplementary Figure S3..... | page 4 |
| IV. Supplementary Figure S4.....  | page 5 |
| V. Supplementary Table S5.....    | page 6 |
| VI. Supplementary Table S6.....   | page 7 |

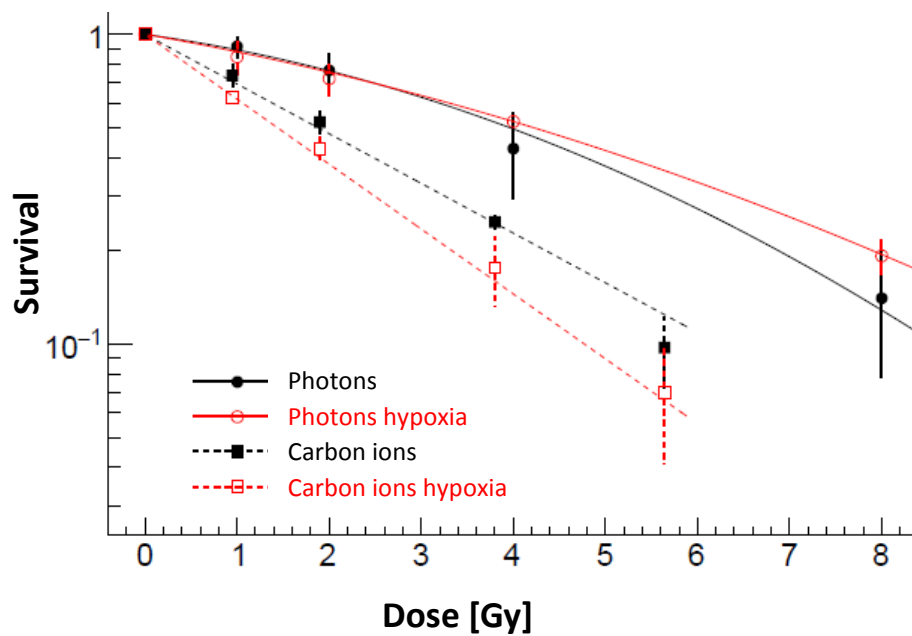

**Figure S1.** Clonogenic survival of the NSCLC cell line H1437 irradiated under normoxia (black) and hypoxia (1 % O<sub>2</sub>, red) with photons (solid line) and carbon ions (dashed line). Bars represent mean  $\pm$  SD of three independent experiments with n=4 technical replicates each.

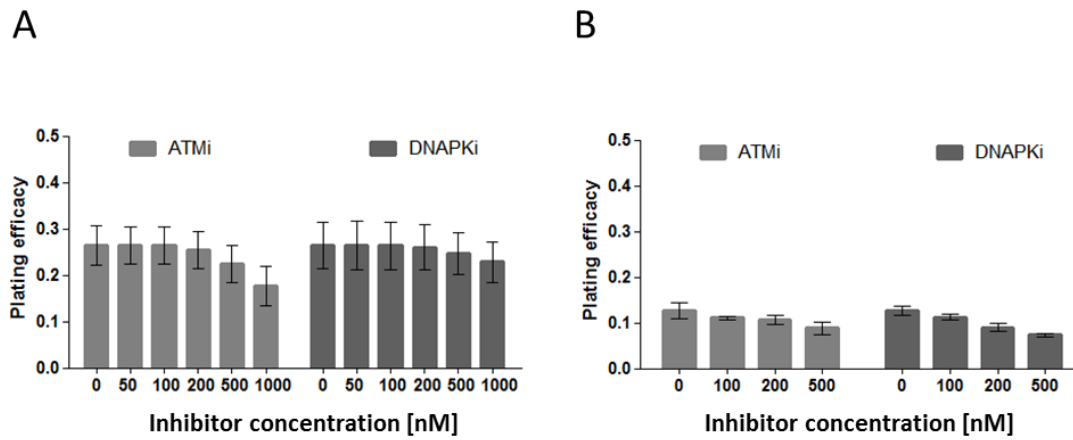

**Figure S2.** Plating efficacy (PE) of H1437 cells after treatment with dose series of ATMi (grey) or DNAPKi (black), respectively, under normoxia (**A**) and hypoxia (**B**). Bars represent mean  $\pm$  SD of three independent experiments with n=4 technical replicates each.

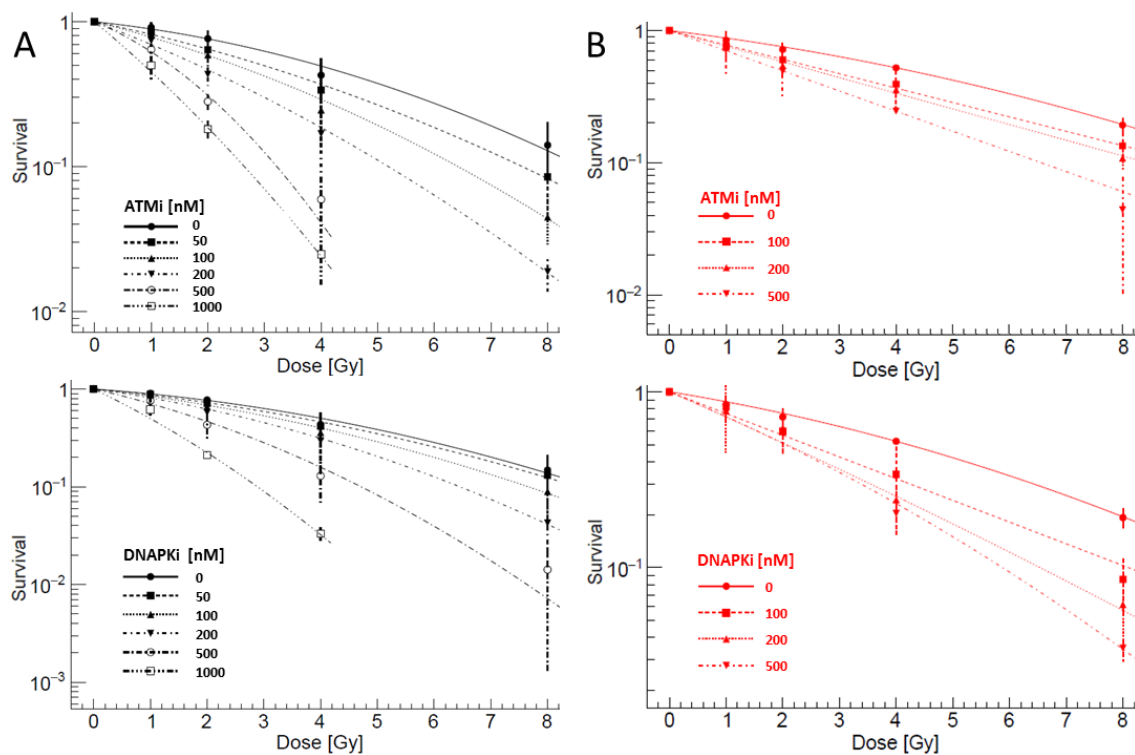

**Figure S3.** Clonogenic survival of H1437 cells irradiated with photons under normoxia (A) and hypoxia (B) in combination with increasing concentrations of ATMi (upper panel) or DNAPKi (lower panel), respectively. Data were normalized to non-irradiated samples at each corresponding baseline inhibitor concentration. Bars represent mean  $\pm$  SD of three independent experiments with  $n=4$  technical replicates each.

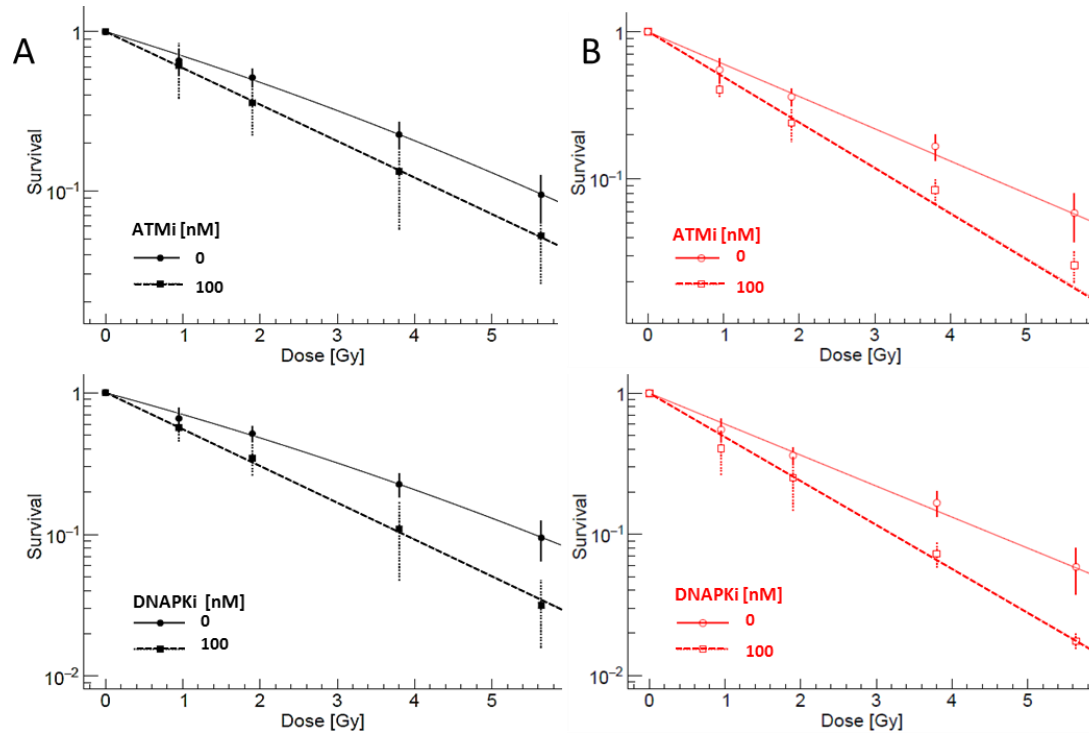

**Figure S4.** Clonogenic survival data for H1437 cells irradiated with carbon ions under normoxia (**A**) and hypoxia (**B**) in combination with 100 nM ATMi (upper panel) or DNAPKi (lower panel), respectively. Data were normalized to non-irradiated cells treated with 100 nM of the DDR inhibitors (baseline). Bars represent mean  $\pm$  SD of three independent experiments with  $n=4$  technical replicates each.

**Table S5.**

**A.** OER and RBE for A549 cells at 30 % survival fraction.

| <b>OER</b>     | <b>SEM</b>  | <b>RBE</b>      | <b>SEM</b>  |
|----------------|-------------|-----------------|-------------|
| <b>Photons</b> |             | <b>Normoxia</b> |             |
| <b>1.39</b>    | <b>0.22</b> | <b>2.65</b>     | <b>0.35</b> |

  

| <b>OER</b>         | <b>SEM</b>  | <b>RBE</b>     | <b>SEM</b> |
|--------------------|-------------|----------------|------------|
| <b>Carbon ions</b> |             | <b>Hypoxia</b> |            |
| <b>1.19</b>        | <b>0.02</b> | <b>3.1</b>     | <b>0.3</b> |

*Abbreviations:* OER: oxygen enhancement ratio; RBE: relative biological effectiveness; SEM: Standard error of the mean

**B.** SER for A549 cells at indicated ATM or DNAPK inhibitor concentrations in combination after photon and carbon ion irradiation under normoxic vs. hypoxic conditions.

| <b>Inhibitor</b>   | <b>SER ATMi</b> | <b>SEM</b> | <b>SER ATMi</b> | <b>SEM</b> | <b>SER DNAPKi</b> | <b>SEM</b> | <b>SER DNAPKi</b> | <b>SEM</b> |
|--------------------|-----------------|------------|-----------------|------------|-------------------|------------|-------------------|------------|
| <b>conc. [nM]</b>  | <b>Normoxia</b> |            | <b>Hypoxia</b>  |            | <b>Normoxia</b>   |            | <b>Hypoxia</b>    |            |
| <b>Photons</b>     |                 |            |                 |            |                   |            |                   |            |
| <b>50</b>          | 1.11            | 0.19       |                 |            | 1.20              | 0.16       |                   |            |
| <b>100</b>         | 1.31            | 0.52       | 1.64            | 0.15       | 1.40              | 0.19       | 2.70              | 0.24       |
| <b>200</b>         | 1.87            | 0.39       | 2.16            | 0.19       | 1.89              | 0.25       | 4.60              | 0.41       |
| <b>500</b>         | 2.54            | 0.34       | 3.63            | 0.33       | 2.13              | 0.28       | 9.75              | 0.94       |
| <b>1000</b>        | 3.28            | 0.49       |                 |            | 5.41              | 0.726      |                   |            |
| <b>Carbon ions</b> |                 |            |                 |            |                   |            |                   |            |
| <b>100</b>         | 1.50            | 0.03       | 1.50            | 0.06       | 1.66              | 0.03       | 1.86              | 0.03       |

*Abbreviations:* SER: Sensitization enhancement ratio; SEM: Standard error of the mean

**Table S6.****A.** OER and RBE for H1437 cells at 30 % survival fraction.

| <b>OER</b>     | <b>SEM</b>    | <b>RBE</b>      | <b>SEM</b>    |
|----------------|---------------|-----------------|---------------|
| <b>Photons</b> |               | <b>Normoxia</b> |               |
| <b>1.09</b>    | <b>0.2136</b> | <b>1.92</b>     | <b>0.2887</b> |

  

| <b>OER</b>         | <b>SEM</b>    | <b>RBE</b>     | <b>SEM</b>    |
|--------------------|---------------|----------------|---------------|
| <b>Carbon ions</b> |               | <b>Hypoxia</b> |               |
| <b>0.78</b>        | <b>0.0231</b> | <b>2.67</b>    | <b>0.3522</b> |

*Abbreviations:* OER: oxygen enhancement ratio; RBE: relative biological effectiveness; SEM: Standard error of the mean

**B.** SER for H1437 cells at indicated ATM or DNAPK inhibitor concentration in combination with photons and carbon ions under normoxic vs. hypoxic conditions.

| <b>Inhibitor</b>   | <b>SER ATMi</b> | <b>SEM</b> | <b>SER ATMi</b> | <b>SEM</b> | <b>SER DNAPKi</b> | <b>SEM</b> | <b>SER DNAPKi</b> | <b>SEM</b> |
|--------------------|-----------------|------------|-----------------|------------|-------------------|------------|-------------------|------------|
| <b>conc. [nM]</b>  | <b>Normoxia</b> |            | <b>Hypoxia</b>  |            | <b>Normoxia</b>   |            | <b>Hypoxia</b>    |            |
| <b>Photons</b>     |                 |            |                 |            |                   |            |                   |            |
| <b>50</b>          | 1.26            | 0.64       |                 |            | 1.06              | 0.34       |                   |            |
| <b>100</b>         | 1.50            | 0.62       | 1.32            | 0.18       | 1.20              | 0.42       | 1.50              | 0.20       |
| <b>200</b>         | 1.95            | 1.24       | 1.44            | 0.19       | 1.42              | 0.47       | 1.82              | 0.24       |
| <b>500</b>         | 2.86            | 0.72       | 1.85            | 0.24       | 2.02              | 1.36       | 1.88              | 2.09       |
| <b>1000</b>        | 3.97            | 10.83      |                 |            | 3.55              | 2.53       |                   |            |
| <b>Carbon ions</b> |                 |            |                 |            |                   |            |                   |            |
| <b>100</b>         | 1.34            | 0.06       | 1.51            | 0.06       | 1.40              | 0.04       | 1.41              | 0.03       |

*Abbreviations:* SER: Sensitization enhancement ratio; SEM: Standard error of the mean
